# Supplementary material for: PERL: a dataset of geotechnical, geophysical, and hydrogeological parameters for earthquake-induced hazards assessment in Terre del Reno (Emilia-Romagna, Italy)
Source: Copernicus journal article supplement (doi:10.5194/nhess-23-1371-2023), 2023-04-14
Supplement: Supplementary file 1 [file nhess-23-1371-2023-supplement.zip]

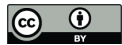

*Supplement of*

**PERL: a dataset of geotechnical, geophysical, and hydrogeological parameters for earthquake-induced hazards assessment in Terre del Reno (Emilia-Romagna, Italy)**

**Chiara Varone et al.**

*Correspondence to:* Chiara Varone ([chiara.varone@igag.cnr.it](mailto:chiara.varone@igag.cnr.it), [chiara.varone@cnr.it](mailto:chiara.varone@cnr.it))

- [nhess-23-1371-2023-supplement-title-page.pdf](#)
- Supplementary material
  - ind\_ln.cpg
  - ind\_ln.dbf
  - ind\_ln.prj
  - ind\_ln.shp
  - ind\_ln.shx
  - ind\_pc.cpg
  - ind\_pc.dbf
  - ind\_pc.prj
  - ind\_pc.shp
  - ind\_pc.shx
  - parameters.xlsx

The copyright of individual parts of the supplement might differ from the article licence.
